## Impacts of extended pandemic on youth and young adults

1  
2  
3  
4  
5  
6  
7  
8  
9  
10  
11  
12  
13  
14  
15  
16  
17  
18  
19  
20  
21  
22  
23  
24  
25  
26

### **How a year of pandemic and related public health measures impacted youth and young adults and the foundations they build upon: Qualitative interviews in Ontario Canada**

Laurel C. Austin<sup>1\*</sup>  
Makayla Nunes Gomes<sup>2,3</sup>  
Sebastian Chavez<sup>1</sup>  
Celina Degano<sup>4</sup>

1. Ivey Business School, Western University, London ON Canada
2. Health Sciences, Western University, London ON, Canada
3. Faculty of Information and Media Studies, Western University, London ON, Canada
4. Public Health Ontario, Toronto ON, Canada

\* Corresponding author

E-mail [laustin@ivey.ca](mailto:laustin@ivey.ca) (LA)

## Impacts of extended pandemic on youth and young adults

28

### 29 **Abstract**

30 **Introduction:** During youth and young adult (YYA) years education, employment, relationships  
31 with family and friends, and important rituals representing transition to new phases of life are  
32 foundations on which personal identity and future well-being are established. These were shaken  
33 by the COVID-19 pandemic. We explore how Ontario YYAs and the foundations they build  
34 upon (education, employment, relationships, transitional events) were impacted by over a year of  
35 pandemic and public health responses to prevent spread.

36 **Methods:** In-depth semi-structured interviews with 19 Ontario YYAs age 16-21 were conducted  
37 during April - June 2021. Reflexive thematic analysis aided by MAXQDA software was used to  
38 iteratively engage with data to search for patterns and shared meaning.

39 **Results:** Thirteen themes were identified, organized into four meta-themes: impacts on self,  
40 impacts on foundations (educational, employment, transitional events/rituals), impacts on  
41 relationships, and coping responses. Many, especially those living with loved ones believed to  
42 risk a fatal outcome from COVID-19, felt the weight of needing to avoid the virus to protect  
43 loved ones. YYAs who were in their last year of secondary school in spring 2020 or 2021 missed  
44 important transitional endings, e.g., graduation. Those graduating in 2020 and going on to post-  
45 secondary school also missed transitional beginnings, e.g., experiencing in-person on-campus  
46 higher education classrooms, living in residence, and meeting new friends. Perceived negative  
47 impacts on education quality and professional development were common. Virtual learning  
48 models and changes to in-person schooling, hastily introduced and evolving over the next year,  
49 did not measure up to traditional learning models.

## Impacts of extended pandemic on youth and young adults

50 **Conclusions:** All of these impacts took a toll. Respondents routinely volunteered concerns about  
51 stress, loneliness, and their mental health. There is need for further research to assess long-term  
52 impacts of these experiences, especially among YYAs who had family members at severe risk,  
53 and those finishing secondary school in spring of 2020.

54

## 55 **Introduction**

### 56 **Background**

57 In response to the World Health Organization (WHO)'s declaration of SARS-CoV-2 (aka  
58 COVID-19) as a global pandemic on March 11, 2020, governments around the world  
59 implemented public health measures to limit viral spread. These included social distancing,  
60 school closures, travel restrictions, quarantine, mask mandates, "lockdowns", and more. Policies  
61 and definitions of key terms (e.g. 'stay-at-home' vs 'lockdown') varied across jurisdictions and  
62 over time as the pandemic evolved, with over 13,000 policy announcements across 195 countries  
63 in the first few months (1).

64

65 During YYA years, important foundations for personal identity and future well-being are  
66 established. Friendships, social interactions, and growing independence are key to development  
67 of personal identity and intimacy (2–4). Friends and parents help young people work through  
68 important decisions (5); friends ease transition to post-secondary education (6). Important life  
69 events, e.g., graduation and first year of post-secondary school, mark transitions to adulthood  
70 (2,4). Quality of education impacts future education, employment, and well-being (7,8).  
71 Apprenticeships, internships, and co-ops offer skill development and expanded networks (9–11).

72

## Impacts of extended pandemic on youth and young adults

73 A natural question then is how were YYAs and these important foundations impacted by the  
74 pandemic and related public health responses that were in place for an extended period?  
75 COVID-19 was the first global pandemic that lasted for over a year since the Spanish Flu which  
76 started in 1918. Thus, research on the impacts of an extended pandemic and public health  
77 responses was necessarily in a nascent state during the COVID-19 pandemic. Interview based  
78 qualitative research, employed in this study, is especially well suited to rich and deep exploration  
79 of new phenomenon, for example, how the pandemic and public health measures impacted  
80 YYAs and the foundations they build upon.

81  
82 From the early months of COVID-19, qualitative studies in South Africa (12), Portugal (13), the  
83 US, (14), and the UK (15,16) reported on YYA experiences across a range of topics. A study in  
84 India (17) focused on concerns related to mandatory university entrance exams. These studies  
85 showed that context matters. For example, YYAs in South Africa were worried about basic  
86 necessities (12); students in India were unable to take mandatory exams, meaning university  
87 entry was delayed a year (17); secondary students in the US were most concerned about  
88 academics and work habits, physical health, and mental health (14).

89  
90 There is a small but growing body of qualitative research on how the extended pandemic  
91 impacted YYAs, including in Canada. Often studies focus on vulnerable or under-represented  
92 populations, or on limited topics. For example, Riazi et al., examined impacts of extended  
93 pandemic on secondary school life across Canada, finding YYAs felt left out of communications  
94 about changes that impacted them, didn't like structural changes implemented during pandemic,  
95 missed important events like graduation, and were concerned about mental health and access to

## Impacts of extended pandemic on youth and young adults

96 supports (18). Interviews with nine Inuit youth leaders in Nunavut, Canada, an Arctic  
97 community, focused on how the pandemic impacted their engagement with I-SPARX, an Inuit  
98 specific e-intervention designed to build resilience in mental health (19). Nobel et al (20)  
99 interviewed homeless youth about the unique structural and psychosocial challenges they faced  
100 during an extended pandemic. Our study was designed to broadly explore how the extended  
101 pandemic and public health measures to reduce viral spread impacted YYAs in Ontario Canada,  
102 examining impacts to the foundations they build their futures upon: relationships, education,  
103 employment, and important transitional events, as well as how they coped with all the changes.

### 104 **Ontario context**

105 Public health measures were established at provincial and local levels based on COVID-19 case  
106 numbers, hospital capacity, and more, meaning guidelines varied across Ontario's 34 public  
107 health units at times. Table 1 provides a timeline of key measures through June 2021. Province-  
108 wide "stay at home orders" were in effect March - June 2020, Dec 2020 – January 2021, and  
109 April 12, 2021 – June 2021; this last period coincided with the time of our interviews. The most  
110 populated areas had additional times with stay-at-home orders.<sup>1</sup> All secondary and post-  
111 secondary switched to virtual education in March 2020. Secondary schools varied approaches to  
112 learning during the 2020-2021 school year (virtual, in-person, hybrid), implemented modified  
113 schedules (quad-mesters, staggered lunch), and varied policies (e.g. regarding extracurricular  
114 activities) (21). Schools shifted between approaches as case counts and public health measures  
115 varied. Ontario led in Canada as the province with the most weeks of in-person school closures

---

<sup>1</sup> Provincial terminology and definitions for periods with the most restrictive measures changed over time, including use of the term 'stay-at-home'; colloquially these were generally referred to as 'lockdown'.

## Impacts of extended pandemic on youth and young adults

116 due to COVID-19 (22). Post-secondary remained almost entirely online with few exceptions,  
 117 e.g., for lab work, through August 2021, and longer for some institutions.

118 **Table 1: Ontario pandemic public health measures March 2020 – June 2021**  
 119

| <b>Date</b>             | <b>Event or public health measures Sources: (21,23–26)</b>                                                                                                                                                                                                                                                                                                           |
|-------------------------|----------------------------------------------------------------------------------------------------------------------------------------------------------------------------------------------------------------------------------------------------------------------------------------------------------------------------------------------------------------------|
| January 25, 2020        | Ontario’s first case of COVID-19.                                                                                                                                                                                                                                                                                                                                    |
| March 11, 2020          | WHO declares COVID-19 a pandemic.                                                                                                                                                                                                                                                                                                                                    |
| March 12, 2020          | Mass public school closures announced, initially for two weeks.                                                                                                                                                                                                                                                                                                      |
| ~ March 15, 2020        | Recreation programs, libraries, private schools, daycares, faith settings ordered closed.                                                                                                                                                                                                                                                                            |
| ~ March 15, 2020        | All post-secondary schools shifted to virtual learning until the end of the term in June; virtual learning remained in effect for the 2020-2021 school year.                                                                                                                                                                                                         |
| March 23, 2020          | All ‘non-essential’ businesses were ordered closed; stay-at-home orders limiting activity outside the home announced; Strong encouragement to practice physical distancing and limit time indoors in public spaces.                                                                                                                                                  |
| By end of March 2020    | All publicly funded secondary schools shifted to virtual learning until the end of the school year in June.                                                                                                                                                                                                                                                          |
| March 2020 - June 2021  | Mask mandates, social distancing measures, and international travel restrictions largely in place.                                                                                                                                                                                                                                                                   |
| Summer 2020             | COVID-19 cases declined; focus on opening up more in-person activities.                                                                                                                                                                                                                                                                                              |
| Starting September 2020 | Elementary and secondary education delivery models varied across the province: fully virtual, blended virtual and in-person, and in-person with COVID-19 precautions (cohorting measures, quadesters scheduling, cancelation of extracurriculars). Individual schools and classes also experienced localized closures responding to positive cases being identified. |
| Nov 23, 2020            | Two largest regions in GTA placed under “lockdown”; people living alone could interact with one other household; measures increased in other areas across the province.                                                                                                                                                                                              |
| December 15, 2020       | Ontario’s COVID-19 vaccination program began; started with health care workers and highest risk populations; vaccine eligibility expanded based on age and other factors; available for 12+ starting May 23, 2021.                                                                                                                                                   |
| December 26, 2020       | Province-wide “shutdown” effected. Return to in-person learning varied by region; the five most populated regions were virtual until February 10, 2021.                                                                                                                                                                                                              |
| April 12, 2021          | Entire province under ‘stay-at-home orders’; province-wide closure of all in-person learning, remaining in effect until the end of the school year                                                                                                                                                                                                                   |

## Impacts of extended pandemic on youth and young adults

### 121 **Research question**

122 We wished to explore how Ontario YYAs and the important foundations they build upon were  
123 impacted by the pandemic and related public health responses that had ebbed and flowed for  
124 over a year. Using qualitative semi-structured interviews we discussed related topics, the focus  
125 of this article. Interviews then turned to impacts on vaping decisions and behaviours, relevant to  
126 a broader research program this is a part of, funded by Canada's Social Science and Humanities  
127 Research Council (SSHRC); findings on that will be reported elsewhere.

### 128 **Materials and methods**

129 In reporting this qualitative research we have followed the consolidated criterial for reporting  
130 qualitative studies (COREQ) (27).

### 131 **Recruitment, respondents and interview methods**

132 Research ethics approval was granted by Western University's Research Ethics Board (REB).  
133 March 1, 2021 thru May 15 2021 participants were recruited through Facebook and Instagram  
134 posts advertising that research was being conducted "to understand how the pandemic has  
135 affected youth and young adults' lives and activities". 178 eligible respondents (ages 16-21,  
136 living in Ontario) completed a Qualtrics pre-screening questionnaire and provided contact  
137 information, demographic data and information about frequency of vaping, smoking and alcohol  
138 use (from not at all to daily). Purposeful sampling maximized diversity amongst respondents,  
139 e.g., in terms of age, gender, ethnicity (and vaping and smoking frequency). Those submitting  
140 the pre-screen were entered into a draw for one of four \$40 retailer gift cards.

141

## Impacts of extended pandemic on youth and young adults

142 Due to public health pandemic restrictions interviews were conducted virtually over Zoom  
143 (n=18) or phone (n=1), during April to June 2021, conducted by two researchers (MG, SC).  
144 Average length was 32 minutes. Interviewers advised respondents to be aware of the degree of  
145 privacy where they were, that the researchers were alone, and that the interview could be stopped  
146 or questions skipped at any time. Because interviews were conducted virtually, with ERB  
147 approval verbal consent was obtained from participants; interviewers reviewed the Letter of  
148 Information (LOI) that had been emailed to invited participants in advance, checked the  
149 appropriate boxes for consent, signed the consent form, and emailed a scan of the fully executed  
150 LOI to the participant after their interview. With consent, interviews were audio/video recorded  
151 and verbatim transcripts produced and verified (n=18) or detailed notes taken (n=1). With a  
152 follow-up thank you e-mail, participants were provided contact information and links to age-  
153 appropriate mental health resources. Parental consent was not required or sought for this  
154 research.

155  
156 Twenty respondents age 16-21 were interviewed; one was dropped from analysis due to  
157 responses that were highly inconsistent, leaving 19. Interviewers felt data saturation had been  
158 obtained at this point, meaning they were not hearing significantly new ideas in the last few  
159 interviews. Twelve respondents identified as female, seven as male (none self-identified  
160 otherwise). Eight were in high school, ten in post-secondary, and one worked full time. Nine  
161 self-identified as White, four as East, South or Southeast Asian, one as Latin American, one as  
162 Middle Eastern; and four as 'mixed-race'; none identified as Black, First Nations, Metis, or Inuit.  
163 14 lived in an urban/city area, four in suburban areas, and one rural. Each interviewed received a  
164 \$30 retailer gift card.



## Impacts of extended pandemic on youth and young adults

165 A semi-structured interview questionnaire was pilot tested with two respondents; their interviews  
166 are included in analysis as only minor changes were made to the protocol following these.  
167 Consistent with growing recognition of the importance of including YYAs in research about  
168 YYAs (28,29) our research benefited from two university student researchers (MG and SC), one  
169 of whom was male, one female, who conducted interviews and were involved in analysis and  
170 manuscript preparation. Respondents were asked first to tell a bit about themselves, with prompts  
171 as needed for who they lived with, whether in school, employed, and how they liked to spend  
172 free time. Each was then asked how their life has been impacted by the pandemic and related  
173 restrictions, with follow-up prompts as needed to ask about impacts on relationships (with  
174 family, friends, significant others), school, employment, and important events. They were asked  
175 how concerned they were about getting COVID-19 and how they have been coping with all of  
176 the changes.

177

## 178 **Analysis Methods**

179 Our approach was informed by reflexive thematic analysis (30–33), whereby we acknowledge  
180 that themes are not objective findings that anyone would reliably conclude ‘emerged from the  
181 data’, but instead are derived from researchers’ iterative engagement with, and subjective  
182 interpretation of verbal data. Like grounded theory approaches (34,35), reflexive thematic  
183 analysis requires iteratively engaging with the data, searching for patterns and shared meaning  
184 among responses, and developing themes that convey what the researchers take away given  
185 intense interaction with responses. Unlike grounded theory methods, thematic analysis does not  
186 require deriving testable theories that explain some phenomenon.

187

## Impacts of extended pandemic on youth and young adults

188 An initial reading of the transcripts and discussion about what we saw in the data was done by  
189 SC, MG, and LA who developed a preliminary set of concepts that we found compelling in the  
190 data. Three of the authors (MG, LA, CD) read the transcripts repeatedly to consider individual  
191 context and further develop themes. One of the authors (CD) brought experience and research  
192 expertise as a public health professional; two were themselves young adults (SC, MG); LA is a  
193 Behavioral Decision Theorist (PhD) with experience in mixed methods adolescent and adult  
194 decision making research. Transcripts were further analyzed by MG and LA using MaxQDA  
195 software to facilitate coding utterances that corresponded to topics of interest, facilitating our  
196 ability to identify similarities, differences, and patterns. The authors met several times to suggest,  
197 discuss, and refine themes. Participants did not provide feedback on the findings.

## 198 **Results**

199 We identified the thirteen themes organized into four meta-themes: impacts on self; impacts on  
200 institutional foundations (education, employment, transitional events/rituals), impacts on  
201 relationships, and how respondents coped with all the changes. Clear in the coping theme is that  
202 mental health was a concern to respondents, arising purely in what respondents volunteered, as  
203 we asked no questions about mental health (we did ask how respondents coped with all of the  
204 changes). Tables 2-6 provide illustrative quotes for themes - we've placed those that exemplify  
205 two or more themes where we feel best offer unique insights.

### 206 **I. Impacts on Self**

207 We identified three themes related to impacts on self: YYAs were at home a lot of the time;  
208 feeling responsible for the health and safety of loved ones weighed heavily; and, international  
209 students faced unique challenges.

## Impacts of extended pandemic on youth and young adults

### 210 **I.1 Ontario YYAs spent a lot of time at home for over a year**

211 One respondent who lived in a rural area and worked full time as an essential worker noted,  
212 “*even with all the lockdowns on and off I haven't felt all that restricted.*” This sentiment was not  
213 shared by other respondents. These discussed how pre-pandemic they were seldom home,  
214 spending time at school, work, in extra-curriculars, and being out with friends, but during the  
215 pandemic were “always” at home. Some more specifically reported mostly being in the basement  
216 or their room. Some mentioned having returned to their parent’s home after leaving post-  
217 secondary residence early in the pandemic; one commented on having had to “*learn how to be a*  
218 *child again*”(03). A few referred to times during summer 2020 when the province ‘opened up’  
219 and they got to live more normally. Illustrative quotes are found in Table 2.

220

221 Few seemed to question whether restrictions were necessary. Those who believed that peers  
222 attended parties or otherwise broke the rules (often based on social media posts) seemed  
223 perplexed or angry about such behaviour. One reported moving away from roommates who did  
224 not follow public health guidance.

225

226 Table 2: Impacts on self (excluding mental health)

227

***I.1. Ontario YYAs spent a lot of time at home for over a year***

*“I was with three roommates who were not always the most Covid safe, so I moved into a studio... it costs a little bit more,.... but it's worth it because I spend like 90% of my time indoors like at my own home...I'm hundred percent happier living here.” (12)*

*“I just am in my room all day, home with my mom, it's only the two of us so there's not even a third person I can like change up the conversation with.” (13)*

*“I live in a small town.... throughout the whole thing I've kind of just gotten used to the new normal and it wasn't that much of a culture shock for me because my daily routine is still work, ride [horses], once in a while see my boyfriend.” (10)*

## Impacts of extended pandemic on youth and young adults

### ***I.2. Feeling responsible for the health or lives of loved weighed heavily***

*“I live with my mom who’s considered a senior...and my sister - she was high risk, she has an autoimmune disease [and] was also pregnant when COVID-19 first started...During the pandemic it was just strictly at home....” (P02)*

*“I didn’t care about getting it, but I can’t give it to my mom. If she gets it, she’s not gonna make it... and my dad not wanting to give her something...even though the law says we can go back and forth [between parent’s homes] - let’s just stop right now. So I wasn’t seeing see my dad, wasn’t seeing my sister...I will do everything I can to avoid somebody.... If I want to get something [in a grocery store] and a person is beside it, I will stand there and wait for 10 minutes if I have to. I’ve been avoiding six feet pretty much at all costs.” (09)*

*“My mom is a high risk patient, she has an auto immune disease ..... So if she gets it, it’s game over. Straight up, that’s it. She gets COVID, she’s gone....so as soon as I was able to get the vaccine, I didn’t even think twice.” (03)*

### ***I.3: International students faced unique challenges***

*“I’ve not really been able to see my family [in-person], since the beginning of the pandemic because of travel restrictions and that’s been really taking a huge mental toll on my mental health... Like if I don’t see them this Christmas it’s going to be my second Christmas in a row, without like my closest family, so that’s really scary.” (12)*

*“...there was like a one-week warning that was issued, and they were like ‘okay leave [residence buildings] after one week,’ and so it was very last minute. It was very hectic ... so I went back home [to Japan] – and the pandemic there wasn’t terrible, but then, when I came back to Canada it got really bad because over here the lockdown was very strict. There was the stay-at-home order. It was pretty boring, and by law, I had to quarantine for two weeks as well, so that made it even harder when I came back for second year. You know, it was just difficult. (P01)*

228

## 229 **I.2 Feeling responsible for health or lives of loved ones weighed heavily**

230 All participants expressed they were not very worried about getting COVID-19 themselves.

231 Some noted times they had been worried, early in the pandemic or when someone they knew

232 tested positive. Most volunteered why they were not worried: they were young, healthy, would

233 only have flu-like symptoms, or would be able to recover if hospitalized. One noted that the new

234 variant in spring 2021 was hospitalizing young people and so recently had been more concerned.

235

236 However, many discussed fears of passing COVID-19 to others (see Table 2 for quotes). Some

237 did not want the ‘blame,’ ‘burden,’ ‘embarrassment,’ or to ‘have it on my conscious’ for

238 spreading COVID-19 to classmates, teachers, parents, or siblings. Most living with family

## Impacts of extended pandemic on youth and young adults

239 discussed family members they perceived as high risk for severe illness or death, perhaps  
240 suggesting ‘high risk’ equates to ‘highest risk in the family’, but with some extremely concerned  
241 about the high risk of fatal outcome if a specific loved one got COVID-19. Respondents  
242 described being “*worried*”, “*stressed*”, or “*terrified*” that high-risk loved ones might contract  
243 COVID-19, and about the possibility they might be the source of exposure. Some described  
244 going to great lengths to avoid others to protect loved ones; those seemed most likely to express  
245 relief offered by recently available vaccines.

### 246 **I.3: International students faced unique challenges**

247 One respondent was an international post-secondary student from Japan; another was from  
248 Singapore. The first discussed the stress of having to suddenly leave Canada when residences  
249 were closed with little notice, then returning to experience a two-week quarantine in the fall. The  
250 second discussed the difficulties of having not seen family since before the pandemic. They  
251 moved to a small apartment by themselves due to concerns about roommate (lack of) social  
252 distancing behaviours. Another student discussed being sad because international friends had left  
253 suddenly over a year earlier and not yet been able to return to Canada. See Table 2 for quotes.

## 254 **II. Impacts on institutional foundations**

255 Impacts on school, employment, and important events were either volunteered by respondents, or  
256 discussed in response to prompts about these. We’ve organized these into four themes. Impacts  
257 on learning were many and varied, summarized into one theme on inferior learning models and  
258 motivation to learn. Respondents were concerned about impacts on professional development.  
259 Many were impacted negatively by changes in employment. Finally, loss of rituals and  
260 transitions was felt keenly.

## Impacts of extended pandemic on youth and young adults

### 261 **II.1: Many felt new learning models were inferior and decreased motivation**

262 While a few respondents suggested learning was not negatively impacted, most reported it had  
263 been. A nursing student described how clinical training, typically in person, was now provided  
264 via virtual lectures. Respondents reported delayed support or less support than what they needed.  
265 Communication with, and access to, educators was challenging: teachers, guidance counselors,  
266 and professors were not as accessible or did not respond quickly to emails; presumably  
267 asynchronous email communication is not the same as being able to raise your hand during class  
268 with a question, immediate response, and dialogue. Illustrative quotes are found in Table 3.

269  
270 The sentiment “*Online school killed my motivation to learn,*” was not unusual. Many  
271 respondents felt they had learned less than they would have otherwise. One post-secondary  
272 student disliked the changes so much they got permission to rearrange the normal co-op schedule  
273 to avoid virtual learning. Some described physical impacts, such as eye-strain and migraines they  
274 attributed to too much screen-time with online school. We heard reports of lower quality  
275 instruction, inability to benefit from peer co-learning, and sub-par on-line assessment methods.

276  
277 Students with Individual Education Plans (IEPs) were not always afforded their  
278 accommodations; for example, rather than a quiet space normally provided for exams, exams  
279 online at home were in the midst of distractions. Even students who had chosen online learning  
280 pre-pandemic, and who expressed that they preferred online learning, expressed frustrations with  
281 education changes brought by pandemic.

282

283

## Impacts of extended pandemic on youth and young adults

284  
285

**Table 3: Impacts on institutional foundations youth build upon**

|                                                                                                                                                                                                                                                                                                                                                                                                                                                                                                                                                                                                                                                                                                                                                                                                                                                                                                                                                                                                                                                                                                                                                                                                                                                                                                                                                                                                                                                                                                                                                                                                                                                                                                                                                                                                                                                                                                                                                                                                                                                                                                                                                                                                                                                                                                                                                                                                                                                                     |
|---------------------------------------------------------------------------------------------------------------------------------------------------------------------------------------------------------------------------------------------------------------------------------------------------------------------------------------------------------------------------------------------------------------------------------------------------------------------------------------------------------------------------------------------------------------------------------------------------------------------------------------------------------------------------------------------------------------------------------------------------------------------------------------------------------------------------------------------------------------------------------------------------------------------------------------------------------------------------------------------------------------------------------------------------------------------------------------------------------------------------------------------------------------------------------------------------------------------------------------------------------------------------------------------------------------------------------------------------------------------------------------------------------------------------------------------------------------------------------------------------------------------------------------------------------------------------------------------------------------------------------------------------------------------------------------------------------------------------------------------------------------------------------------------------------------------------------------------------------------------------------------------------------------------------------------------------------------------------------------------------------------------------------------------------------------------------------------------------------------------------------------------------------------------------------------------------------------------------------------------------------------------------------------------------------------------------------------------------------------------------------------------------------------------------------------------------------------------|
| <p><b>II.1 Many YYAs felt new learning models were inferior and affected motivation to learn</b></p> <p><i>"...the majority of my [nursing] evaluations are supposed to be in person, clinical doing certain skills and everything... My clinical experience was basically a virtual clinical experience and that entailed every Friday for 8-12 hours I would sit here and listen to my clinical instructor." (P02)</i></p> <p><i>"The online kids from the start have kind of been screwed over in a couple of ways, like we haven't got the same resources and guidance counselors and teachers take a really long time to reply to emails and everything because they don't see us every day, so it's weird. (17)</i></p> <p><i>"I think I could have done better if it was in person like if I could've talk to the Professor more, if office hours weren't on Zoom." (13)</i></p> <p><i>"From an educational point of view it basically ruined my love for education... there was less support for students, ironically. And the quality, the teaching went down, the classes got more difficult as life was getting more difficult." (03)</i></p> <p><i>"I'm not able to have that like one-on-one contact with the teachers. I have to email them and like hope that they reply within, you know, a couple of days...I feel I learned better being able to like sit there and interact with students. Rather than just watching an online lecture and having to just submit assignments, without any communication." (11)</i></p> <p><i>"I might have a 96 in accounting right now, which is the highest mark I've ever had, but if I take grade 12 accounting I'm going to look at a sheet and go, 'What is this?' Right? It's coming in one ear, coming out the other ear." (09)</i></p> <p><i>"I've actually liked online quite a bit, but I think that's just because I like kind of self-paced learning more" (17).</i></p> <p><i>"My school is very very fortunate to have ... a very strong parents' association, who is willing to fund their endeavors, so the quality of education at my school is overall pretty okay." (18)</i></p> <p><i>"... we would get hit with the high case numbers and we'd go to all online, I just found it would be difficult to find the motivation to sit down and work. Just because it's the same thing, every day, like just waking up, going to my computer, going back to bed. It's monotonous." (07)</i></p> |
| <p><b>II.2 COVID-YYAs fear loss of professional development opportunities</b></p> <p><i>"...its crunching away time from my professional development. And it also makes me anxious about what life's going to be like, for me, when I graduate [from university], because I feel like because of the pandemic I have not been able to have the work experience I wish I had on graduating, and so I feel like it's set me back." (12)</i></p> <p><i>"... you finish your recruit training by going away to a military base in Quebec for a course. But because of COVID ... of course the camps shut down, so I wasn't able to go on that the course, which has held back my training by about a year."</i></p> <p><i>"I'm missing a lot of [nursing education] clinical experience which has an impact on what I'm going to do in the future." (P02)</i></p>                                                                                                                                                                                                                                                                                                                                                                                                                                                                                                                                                                                                                                                                                                                                                                                                                                                                                                                                                                                                                                                                                                                                                                                                                                                                                                                                                                                                                                                                                                                                                                                                       |
| <p><b>II.3 Lost and reduced employment for many</b></p> <p><i>"Actually during the pandemic I applied to a lot more jobs. I haven't gotten like a lot of responses, unfortunately, but I haven't applied to a lot of places... both my parents lost their jobs, so I felt like in an awkward position to, you know, have to deal with money." (04)</i></p> <p><i>"We're always in and out of lockdowns and, obviously, they weren't hiring. And now, trying to get a job now is just as bad, honestly worse. So I've just been doing so many job applications." (14)</i></p>                                                                                                                                                                                                                                                                                                                                                                                                                                                                                                                                                                                                                                                                                                                                                                                                                                                                                                                                                                                                                                                                                                                                                                                                                                                                                                                                                                                                                                                                                                                                                                                                                                                                                                                                                                                                                                                                                        |

## Impacts of extended pandemic on youth and young adults

*“My hours got decreased to nothing and I was laid off for a month. And now again, because it's a small business that I work for.” (16)*

*“I quit my job because of it, like near the start of the pandemic and I'm only like kind of starting to work again like kind of now.” (17)*

*“It's like ‘oh yes, I get to work this week, I get to get out of the house finally’. And then it's like ‘Oh no, you don't.’ But I will say, when I do get go and work, talk to my mentor sort of thing, it's a really good opportunity that once a week, if I do get it.” (09)*

*I actually haven't really missed a day of work, other than for two covid tests, waiting on those. I was never like laid off or anything. I was just fortunate to be considered essential. (10)*

### **II.4: Stolen beginnings, endings, transitions and autonomy**

*“This was supposed to be my Grad year and I missed all of it. I don't know if my school is going to do a prom or anything like that. And on top of that, I transferred there for grade 11, and so I had [only] that year to meet people...and now I've had this year of the pandemic. With COVID-19 it sucks just to miss a whole year, my last year.” (07)*

*“I didn't understand the difference between high school and university first year, and it was a big change. I don't think I could see that because I went from Zoom High School to Zoom University, which to me seems the same, but like it was much heavier, like the educational aspect. So mentally it, it was overwhelming...[Later in interview] I missed the whole year of my teenage dream lifestyle.” (13)*

*“I just started university, right? So my first year I didn't really get to meet anybody. It's kind of just like made everything kind of lonely. Stressful, with school especially, because it's online.” (11)*

286

287

## 288 **II.2: COVID-YYAs fear loss of professional development opportunities**

289 Some discussed how professional training and development opportunities had been negatively  
290 impacted, with concerns about long-term impacts on skills and careers (see Table 3 for  
291 illustrative quotes). A post-secondary student noted that while she was able to work in a co-op  
292 position, most of her friends had lost this opportunity due to employers suspending co-op  
293 programs. She felt “robbed” of her co-op experience because she had to work virtually from her  
294 bedroom. An engineering student was concerned about the lack of internship opportunities he  
295 believed were needed to secure a good job after graduation.

296

297



## Impacts of extended pandemic on youth and young adults

### 298 **II.3 Lost and reduced employment for many**

299 All participants were asked about employment status and whether employment had been  
300 impacted during the pandemic. Only two had never been employed; one was seeking  
301 employment (so far unsuccessfully); the other wanted to work to pay for further education but  
302 lived with immune-compromised grandparents and so could not. Of those currently working,  
303 most had had periods of reduced hours or unemployment during the pandemic (see Table 3).  
304 Many had lost or quit jobs due to the pandemic; some were currently seeking new opportunities,  
305 others had found new employment. A couple mentioned wanting to earn their own income  
306 because parents had become unemployed during the pandemic.

307 A common sentiment was that employment provided an opportunity to get out and interact face-  
308 to-face with others, although those who had transitioned to virtual work did not experience that.  
309 One felt fortunate to be an “essential worker” and had worked throughout the pandemic.

### 310 **II.4: Stolen beginnings, endings, transitions, and autonomy**

311 Several discussed delayed or missed beginnings, endings, milestones, and transitions from one  
312 phase in life to the next (see quotes in Table 3). Those who were finishing grade 12 when  
313 interviewed (n=5) discussed losing their entire last year of high school, including important end-  
314 of-year events. One said that even though she might not have wanted to attend things like prom,  
315 she'd have liked having the choice. Three were completing their first year of post-secondary  
316 school when interviewed, meaning the pandemic struck at the end of their secondary school  
317 education. These discussed missing important end-of-secondary-school events and rituals like  
318 graduation, and because universities were virtual for the 2020-21 school year, they also lost out  
319 on important aspects of their first year of post-secondary education. This included, for example,

## Impacts of extended pandemic on youth and young adults

320 including living on-campus, rituals that solidify the transition to post-secondary such as moving  
321 away from parents and participating in first year orientation activities, and meeting new friends.

### 322 **III. Impacts on relationships**

323 We identified three sub-themes related to relationships with friends, parents, and dating: friend  
324 circles grew smaller and sometimes closer; relationships with parents varied over time; and,  
325 impacts on dating varied. A fourth theme on digital socializing and collaborating is also  
326 identified and discussed.

#### 327 **III.1 Friend circles grew smaller; some friends grew closer**

328 Several participants reported they no longer engaged with acquaintances or peripheral friends.  
329 Some, especially in first-year post-secondary, were sad about missing out on the opportunity to  
330 meet new people and make new friends. Pain from not being able to be with friends was  
331 palpable. One mentioned their best friend's family was still living in isolation, and they could  
332 only get together if physically distanced. However, several discussed becoming closer to some  
333 friends, or became closer to a small group of friends. Many discussed how their time spent in-  
334 person with friends had changed, meeting in smaller groups and often outdoors (e.g., walking,  
335 riding bikes). Those most likely to report seeing friends as they had before the pandemic were  
336 post-secondary students living independently, often with roommates. One reported getting  
337 together with friends on a regular basis "*in socially safe ways,*" but also acknowledged that there  
338 were times gatherings were not safe. A few mentioned that their boy/girlfriend was the only, or  
339 one of the few, people they spent time with. Illustrative quotes are in Table 4.

340

341

342

## Impacts of extended pandemic on youth and young adults

343  
344

Table 4: Impacts on relationships

|                                                                                                                                                                                                                                                                                                                                                                                                                                                                                                                                                                                                                                                                                                                                                                                                                                                                                                                                                                                                                                                                                                      |
|------------------------------------------------------------------------------------------------------------------------------------------------------------------------------------------------------------------------------------------------------------------------------------------------------------------------------------------------------------------------------------------------------------------------------------------------------------------------------------------------------------------------------------------------------------------------------------------------------------------------------------------------------------------------------------------------------------------------------------------------------------------------------------------------------------------------------------------------------------------------------------------------------------------------------------------------------------------------------------------------------------------------------------------------------------------------------------------------------|
| <p><b>III.1 Friend circles grew smaller; some friends grew closer</b></p> <p><i>“A lot of my friends, I lost them, but I got really close with two or three people. And they're really good friends.”</i> (09)</p> <p><i>“I’ve definitely seen people outside of my family significantly less, like pretty much not at all.”</i> (17)</p> <p><i>“My closest friends, I see less, but I still see somewhat consistently. It's more acquaintances that I've like fallen out of touch with ... I mean the circle has to be kept small.”</i> (06)</p> <p><i>“I was really hoping to meet people [in 3<sup>rd</sup> year of university] but you can't really meet people virtually ....Everyone sells you these are the greatest years of your life....”</i> (15)</p>                                                                                                                                                                                                                                                                                                                                     |
| <p><b>III.2 Relationships with parents varied over time, often ultimately improving</b></p> <p><i>“My relationship with my family has probably gotten better just because being so close for so long, you have to really work on communication.”</i> (17)</p> <p><i>“At the beginning last year, like we fought a lot, because we weren't used to being home all the time, we are both pretty busy. She was traveling for work a lot before this started, but now I would say that we're closer and get along well.”</i> (01)</p> <p><i>“Last Christmas I was completely shut off from my parents so I was like, ‘I did not want to talk to you guys, this is so awful, like talking to you is only going to make me sad.’ So they were like. ‘Okay we'll give you the space.’ But I would describe it as healthy now because I feel like I get ample space, but I can also Facetime them whenever I want.”</i> (12, international student)</p> <p><i>“One aspect is being cooped up all together, makes it hard for parents to have time alone. And they fight a lot because of that.”</i> (02)</p> |
| <p><b>III.3. Impacts on dating varied</b></p> <p><i>“I didn't see my girlfriend for like three months. I went from basically living next to her, and we were very close, to living very far away [with parents, to save money]. It put a big big big big massive strain on our personal relationship...at this point, I decided I need to move to [city name] so I can be closer.”</i> (03)</p> <p><i>“We’re still able to see each other, like we’re in [rural town name]. There's all sorts of things to do outside, so we're pretty fortunate about that.”</i> (10)</p> <p><i>“Pandemic life was just like a strain. I don't know how to say it like there's nothing else and you're so dependent. The littlest thing goes wrong, it seems like a big deal because there's like nothing else going on. So yeah, that was a strain that ended that relationship.”</i> (14)</p> <p><i>“He's pretty much the only person who I have been really talking to consistently, and I would say that our relationship has grown.”</i> (18)</p>                                                              |
| <p><b>III.4: Digital socializing and collaborating was not the same</b></p> <p><i>“Yeah, phone calls and Facetime, like that's all good, but like at a certain point it's like it's almost feels like a physiological need to like, to have like that in-person interaction, and so that was challenging.”</i> (15)</p> <p><i>“My school’s band [is] going to try to do some kind of virtual thing, but we haven't been able to practice or meet at all, because that would be higher risk, as well having no mask on.”</i> (01)</p>                                                                                                                                                                                                                                                                                                                                                                                                                                                                                                                                                                 |

## Impacts of extended pandemic on youth and young adults

*“I don't think any of my friends participated in frosh online, because it was like there's no point....it's not the same as physical orientation where you're like, 'Hey I wanna do this, do you want to be friends?'” (13)*

*“Every Sunday, it was really weird watching live services of church streams, it didn't feel like you were there. I didn't feel like I was with my family, so I felt very disconnected.” (13)*

*“I made a Discord server, and we have over 500 people in it now. That kind of saved me. Without that, me and all the people who use it would not have friends at school. And so I made that server as a way for, like you know, you like you go to home, and then you talk to your friends before class. That kind of thing, or you studied together, you play games together, new talking, make connections in the school. So that, that's the way I got around it, and I've met up with some of the people. It's just not the same as university. (02)*

345

### 346 **III.2 Relationships with parents varied over time, often ultimately improving**

347 Many participants reported improved relationships with parents during the pandemic. Several  
348 said that relationships were strained early in the pandemic, but had improved since. Some  
349 discussed ongoing issues, not so much in their relationship with parents, but in their parents'  
350 relationship with each other. Qualitative research early in the pandemic found adolescents  
351 reported struggles with family conflict, and stressed and unsupportive family members (Scott et  
352 al., 2021); the current study is suggestive that after a more extended periods with stay-at-home  
353 orders, these relationships actually improved. See Table 4 for illustrative quotes.

### 354 **III.3: Impacts on dating varied**

355 About half the respondents discussed dating or relationships with significant others. Several  
356 discussed how the pandemic impacted dating, for example having to move back to a parent's  
357 home created physical distance and stress; trying to maintain a relationship via Face-time; only  
358 seeing each other out-of-doors; the fact that things were easily blown out of proportion as  
359 pandemic stresses added up. We heard of delaying a first romance because of inability to be  
360 together in person. Some discussed breaking up, while others started a relationship during the  
361 pandemic; such events of course may have had nothing to do with the pandemic. At least one

## Impacts of extended pandemic on youth and young adults

362 respondent noted they had no out-of-pandemic experience to compare starting or ending a  
363 relationship to. See Table 4 for illustrative quotes.

### 364 **III.4: Digital socializing and collaborating is not the same**

365 Respondents reported that as with learning, socializing had shifted to virtual platforms. They  
366 talked about face-time with friends, “*maintaining friends*” online, socializing virtually via  
367 Netflix and Discord parties, playing video games, and virtually consuming substances together.  
368 For some, work moved online. School and extra-curricular activities such as band, dance  
369 competitions, and graduation ceremonies became virtual activities. While time together digitally  
370 helped, it was not the same as being in person with people. See Table 4 for illustrative quotes.

## 371 **IV. How respondents coped with all the changes**

372 Although we did not ask about mental health, many participants volunteered comments  
373 throughout their interviews about stress, anxiety, mental health, being lonely, finding things  
374 hard, etc., summarized in the theme, *This all took a toll*. We did ask respondents how they had  
375 coped with all the changes, and found diverse coping strategies as summarized in the second  
376 theme, *Coping strategies were diverse*.

### 377 **IV.1 This all took a toll, including on mental health**

378 We heard of “*monotonous*” “*repetitive*” days that “*melted together*”, of being lonely and unable  
379 to see friends. Several used the term “*disconnected*.” We heard of having felt overwhelmed,  
380 losing motivation to learn, socialize, or leave the house. Respondents discussed feeling stressed,  
381 lack of control, the unknown of when it will all change, when it will feel ‘normal’ again, being  
382 diagnosed with depression or anxiety, or worsening mental health conditions. Often this came up  
383 when discussing something that had been lost as conveyed in many of the themes above. One  
384 expressed, “*After a certain point, like just, like you just have to start laughing at it, you know,*

## Impacts of extended pandemic on youth and young adults

385 because it's like if you don't laugh at it, like you'll just cry about it. So like, which one do you  
386 want to do" (15, 3rd year post-secondary). See other illustrative quotes in Table 5.

387

388

Table 5: Impacts on how YYAs coped

### **IV.1 This all took a toll**

*"It's kind of been hard. After a while I noticed that like my mental health definitely decreased. So a couple of months ago - in around like I would say March - I got diagnosed with depression and anxiety. And I think a lot of that is to do with the pandemic, because I feel so like disconnected."* (11)

*"I haven't seen any friends for over a year. Stuck inside. My mental health has pretty much gone to shit at times."* (09, the participant reported mother being high risk, and taking steps to avoid people)

*"I think my mental health has definitely taken a big hit, because I've gotten so used to just not doing anything that like even the smallest bit of like interaction is really really draining now, because I think I've just adapted to sitting inside and doing nothing."* (17)

*Like it's taken such a bad mental toll on me that I, it almost felt like I was in purgatory at that time, like I'm seeing so many people, but now I've gone down a little bit, like I only see like probably like five to seven people on a regular basis."* (12)

*"There is a period of time where I was like living alone, like during the winter, and already kind of get you know, bit of like the like seasonal depression, like winter blues. So that was kind of compounded by the fact that I was just like completely alone."* (15)

*"The pandemic affected my university life, like putting everything online. Like due dates sometimes are very hard to keep a track of and everything, so the stress really gets to me I guess."* (P01)

*"I saw the horrors of Covid with my own ears. I lived it through other people; I worked at an Employment Insurance call center. It was brutal."* (03)

### **IV.2: Coping strategies were diverse**

*"I picked up a lot more hobbies, better indoors, I learned how to, so I've been reading and writing like crazy."* (16)

*"I still facetime my roommates now, even though we don't live together. Me and my roommates would still like try to make the best out of things and like make fun out of like going to the grocery stores, like going for a walk and stuff like that trying to do activities together. So it was just like I guess it's, just like the support system of like reaching out to people."* (14)

*"It's been a roller coaster so it's like ups and downs. I think at certain times I've definitely freaked out like I can't do this anymore, but sometimes even today, I know that, like for Ontario, June 14 or dates are going around [in the media] when it might open up. So I'm like 'Oh, we might not get to just be at home anymore, I might have to actually go to work'. So I have moments where I'm excited."* (13)

## Impacts of extended pandemic on youth and young adults

*“ just like smoke some weed like you know every night just to like have the time passed by” (15)*

*“...a coping mechanism I did start, and I’m not really proud of, is I started smoking [cannabis] a lot more often. Which is not a good thing but I’ve noticed it increased a lot once the pandemic hit... I’m basically stagnant at home, so why not go and smoke? So that was a coping mechanism, a negative one. A positive one for me is I also got a lot more exercise, I went out for a lot more walks. I walked my dog a lot more, going for even a lap around the block. Things just for my mental clarity.” P02*

389

### 390 **IV.2: Coping strategies were diverse**

391 We asked participants how they were coping with all of the changes. Some volunteered they  
392 smoked, vaped, or used cannabis to cope or relieve stress (see example quotes in Table 5). Some  
393 discussed going for walks with friends, discovering new activities/hobbies, exercising more. One  
394 was proud of having started a discord server to allow students to socialize and work together.  
395 Coping strategies may have shifted over time. Some discussed looking forward to when the  
396 restrictions would end. One secondary school student who’s mother was at high risk and who  
397 reported generally not seeing anyone described what he’d done to cope:

398 *“This semester, I kind of started to put a thing in place and go: okay I’m going to use excel*  
399 *and I’m going to make a schedule, I’m going to look at this. You know, I’ve done too much*  
400 *work, I’m going to go outside, go for a bike ride. Setting myself goals. So I’m trying to hit*  
401 *10K in 30 minutes, which I hit the other day, and it was the first time I felt euphoric in a*  
402 *long time.” (09)*

## 403 **Discussion**

404 The present study sought to explore how youth and young adults in Ontario Canada were  
405 impacted by over a year of the COVID-19 pandemic and public health responses to limit viral  
406 spread through analysis of rich verbal data. We’ve shared thirteen themes we took from the  
407 interviews, several of which reflect loss. Some losses were the result of not experiencing

## Impacts of extended pandemic on youth and young adults

408 something that was looked forward to, such as important rituals, moving away from home,  
409 meeting new friends in a next phase of life, a first job, or first romance. Some losses represented  
410 loss of something in hand, such as time with friends, collaborative learning, and employment.  
411 Other losses represented lost potential, in terms of knowledge learned and skills needed for future  
412 success and well-being. Respondents discussed measures they took to protect themselves, for  
413 example, moving back to parent's home, which also led to losses, for example being physically  
414 distanced from friends. The losses were deeply felt. And yet, our sense was that our respondents  
415 largely did not question the necessity of public health measures; many expressed negative  
416 feelings towards others who they perceived were not following the rules.

417  
418 As found in studies early in pandemic, participants discussed loved ones believed to be at high  
419 risk of COVID-19 and their need to protect them (13,14,36). There was some sense that 'high  
420 risk' meant 'highest risk in household', and that feeling responsible for loved ones' health was  
421 fairly common. However, some had family members who they believed were likely to suffer a  
422 fatality if they contracted COVID-19. These youth were especially likely to discuss extra  
423 precautions they took, delaying employment, avoiding physical proximity to people, and seldom  
424 seeing friends, to protect loved ones. YYAs who felt responsibility and accountability for  
425 loved ones' health seemed impacted by the stress of having to constantly weigh their own  
426 and others' risk in decisions to leave home or see friends, extended over more than a year.  
427 These youth seemed especially likely to express relief that COVID-19 vaccinations, still a recent  
428 innovation, were now available. The extended period of stress and worry could have long term  
429 impacts; this cannot be known without further research.

430



## Impacts of extended pandemic on youth and young adults

431 A subset of our participants experienced loss and unhappiness over delayed or missed  
432 milestones. Prominent was unhappiness around missing the end of secondary school in spring  
433 2020 or spring 2021. Feelings expressed are consistent with findings from an extensive stream of  
434 research showing that “people’s global evaluations of past affective episodes can be well  
435 predicted by the affect experienced during just two moments: the moment of peak affect intensity  
436 and the ending” (37,38). In other words, how something, e.g., the last year of secondary school,  
437 will be remembered will be based on feelings at the low or high point during the experience, or  
438 feelings as the experience ends. This stream of research shows that when people approach the  
439 end of something important to them, they tend to spend more time with close friends. This was  
440 not possible given pandemic response restrictions, perhaps adding to the intensity of the loss.

441  
442 Like studies early and others later in the pandemic, our respondents discussed lost milestones  
443 such as graduation associated with learning (13,14,18). Our respondents who missed secondary  
444 school graduation in 2020 all began post-secondary education that fall. They were not able meet  
445 other students, faculty, or staff face-to-face, and are unique in Canadian (and elsewhere) history  
446 for starting post-secondary education completely virtually, not by choice, and with virtual  
447 learning models that were new to all involved and evolving in real-time. Our sense is that these  
448 young adults were especially impacted by the pandemic, due to the loss of important endings *and*  
449 not being able to transition to important new beginnings as expected, for example, leaving home  
450 and experiencing new approaches to education. Its’s important to note that a norm in many  
451 Canadian universities is for students to live in residence on campus only in first year and then  
452 move off-campus; missing this, and other opportunities to form close friendships in first year,  
453 could have lasting impacts that can only be assessed with further research. Our sample is limited

## Impacts of extended pandemic on youth and young adults

454 in lacking secondary school respondents who did not start/plan further education, and so we  
455 cannot comment on the population that went directly into employment (or unemployment).

456  
457 All of the changes meant not seeing friends in-person, having fun, hanging out, learning together.  
458 This was keenly felt by our respondents who expressed feeling lonely, missing their friends, and  
459 having mental health impacted, like findings in a large body of research that has examined  
460 mental health of YYAs during the pandemic (e.g., Khan et al., 2020; López-Castro et al., 2021;  
461 McCluskey et al., 2021). We heard from respondents that new virtual learning models and  
462 changes to in-person schooling, hastily introduced at the start of the pandemic and evolved over  
463 the next year, did not measure up to traditional learning models. Respondents told us of  
464 monotonous days, largely alone, at home. Many volunteered that they had been lonely, stressed,  
465 anxious, or depressed, and that their mental health had been impacted. While we did intend to  
466 study mental health, and do not claim to have assessed it in any way, clearly their own mental  
467 health was on the minds of many of our respondents. Given the extended periods of stay-at-home  
468 orders in Ontario, and high number of days spent in virtual learning, we would be especially  
469 concerned for lasting impacts on some YYAs in Ontario and other localities with extended  
470 public health measures.

471  
472 Perhaps a bright spot in the pandemic was that some relationships deepened and improved for  
473 some YYAs during the extended pandemic. Several discussed difficult relationships with parents  
474 early in pandemic, as reported in other studies from early in pandemic (13,14). However, several  
475 went on to report that their relationships evolved, leading them to feel closer to parents at the

## Impacts of extended pandemic on youth and young adults

476 time interviewed. We also heard from several respondents that they developed closer  
477 relationships with some friends during the pandemic.

## 478 **Conclusions**

479 There was only a short window during which research on the impacts of the COVID-19  
480 pandemic could be conducted. Our study is one of few qualitative studies published on impacts  
481 to YYAs after over a year of pandemic, taking place in Ontario Canada, which, as noted earlier,  
482 had ‘stay-at-home’ orders in place over much of that year, the Canadian province with the most  
483 weeks of in-person school closures. While our sample was small, it is suggestive that YYAs who  
484 lived with family members perceived to be at highest health risks from COVID-19, and those  
485 who were in their final year of secondary school in spring 2020, entering post-secondary in fall  
486 2020, suffered unique impacts that could have long-lasting effects.

487  
488 While our research is limited by a small sample, discussions were rich and illuminating, and  
489 sometimes evoked strong emotions. The YYA population is very diverse and not all would have  
490 had the same experiences. While some really struggled, and some reported turning to substances  
491 to help cope, others were able to cope and saw improvements in close relationships. This study  
492 provides some insights into YYA behaviour and adapted coping strategies employed during an  
493 extended pandemic period of high uncertainty and change.

## 494 495 **References**

- 496  
497 1. Cheng C, Barceló J, Hartnett AS, Kubinec R, Messerschmidt L. COVID-19 Government  
498 Response Event Dataset (CoronaNet v.1.0). *Nat Hum Behav.* 2020 Jul;4(7):756–68.
- 499 2. Branje S, de Moor EL, Spitzer J, Becht AI. Dynamics of Identity Development in  
500 Adolescence: A Decade in Review. *Journal of Research on Adolescence.* 2021;31(4):908–  
501 27.

## Impacts of extended pandemic on youth and young adults

- 502 3. Erikson H. Identity: Youth and crisis. WW Norton and Company; 1968.
- 503 4. Paul EL, White KM. The development of intimate relationships in late adolescence.  
504 Adolescence. 1990;25(98):375.
- 505 5. Wilks J. The relative importance of parents and friends in adolescent decision making. J  
506 Youth Adolescence. 1986 Aug 1;15(4):323–34.
- 507 6. Buote V, Pancer S, Pratt M, Adams G, Birnie-Lefcovitch S, Polivy J, et al. The Importance  
508 of Friends: Friendship and Adjustment Among 1st-Year University Students. Journal of  
509 Adolescent Research - J ADOLESCENT RES. 2007 Nov 1;22(6):665–89.
- 510 7. Michalos AC. Education, Happiness and Wellbeing. Soc Indic Res. 2008 Jul;87(3):347–66.
- 511 8. Solberg VS, Howard K, Blustein D, Close W. Career Development in the Schools:  
512 Connecting School-to-Work-to-Life. The Counseling Psychologist. 2002 Sep 1;30:705–25.
- 513 9. Haddara DM. A reflection on cooperative education: from experience to  
514 experiential learning. Asia-Pacific Journal of Cooperative Education. 2007;8(1):67–76.
- 515 10. Ryan P. Is apprenticeship better? a review of the economic evidence. Journal of Vocational  
516 Education & Training. 1998 Jun;50(2):289–325.
- 517 11. Virtanen A, Tynjälä P, Eteläpelto A. Factors promoting vocational students' learning at  
518 work: study on student experiences. Journal of Education and Work. 2014 Jan 2;27(1):43–  
519 70.
- 520 12. Gittings L, Toska E, Medley S, Cluver L, Logie CH, Ralayo N, et al. 'Now my life is stuck!':  
521 Experiences of adolescents and young people during COVID-19 lockdown in South Africa.  
522 Global Public Health. 2021 Jun 3;16(6):947–63.
- 523 13. Branquinho C, Kelly C, Arevalo LC, Santos A, Matos MG de. "Hey, we also have something  
524 to say": A qualitative study of Portuguese adolescents' and young people's experiences  
525 under COVID-19. Journal of Community Psychology. 2020;48(8):2740–52.
- 526 14. Scott SR, Rivera KM, Rushing E, Manczak EM, Rozek CS, Doom JR. "I Hate This": A  
527 Qualitative Analysis of Adolescents' Self-Reported Challenges During the COVID-19  
528 Pandemic. Journal of Adolescent Health. 2021 Feb 1;68(2):262–9.
- 529 15. Burgess RA, Kanu N, Matthews T, Mukotekwa O, Smith-Gul A, Yusuf I, et al. Exploring  
530 experiences and impact of the COVID-19 pandemic on young racially minoritised people in  
531 the United Kingdom: A qualitative study. PLOS ONE. 2022 May 4;17(5):e0266504.
- 532 16. Demkowicz O, Ashworth E, O'Neill A, Hanley T, Pert K. "Will My Young Adult Years be  
533 Spent Socially Distancing?": A Qualitative Exploration of Adolescents' Experiences During  
534 the COVID-19 UK Lockdown. Journal of Adolescent Research. 2022 Jun  
535 1;07435584221097132.

## Impacts of extended pandemic on youth and young adults

- 536 17. Roy B, Roy A. Conducting examinations in India: Emergency, contention and challenges of  
537 students amidst covid-19 pandemic. *Children and Youth Services Review*. 2021 Jan  
538 1;120:105768.
- 539 18. Riazi NA, Goddard J, Lappin S, Michaelson V, Wade TJ, Patte KA. “The most important  
540 thing is to communicate with students”: experiences and voices of Canadian youth during the  
541 COVID-19 pandemic. *International Journal of Adolescence and Youth*. 2023 Dec  
542 31;28(1):2239327.
- 543 19. Thomas A, Bohr Y, Hankey J, Oskalns M, Barnhardt J, Singoorie C. How did Nunavummiut  
544 youth cope during the COVID-19 pandemic? A qualitative exploration of the resilience of  
545 Inuit youth leaders involved in the I-SPARX project. *International Journal of Circumpolar  
546 Health*. 2022 Dec 31;81(1):2043577.
- 547 20. Noble A, Owens B, Thulien N, Suleiman A. “I feel like I’m in a revolving door, and COVID  
548 has made it spin a lot faster”: The impact of the COVID-19 pandemic on youth experiencing  
549 homelessness in Toronto, Canada. Cabieses B, editor. *PLoS ONE*. 2022 Aug  
550 22;17(8):e0273502.
- 551 21. Gallagher-Mackay K, Srivastava P, Underwood K, Dhuey E, McCready L, Born K, et al.  
552 COVID-19 and Education Disruption in Ontario: Emerging Evidence on Impacts. *Science  
553 Briefs of the Ontario COVID-19 Science Advisory Table*. 2021;2(34):36.
- 554 22. People for Education. A perfect storm of stress: Ontario’s publicly funded schools in year  
555 two of the COVID-19 pandemic [Internet]. 2022 [cited 2023 Oct 4] p. 36. Available from:  
556 [https://peopleforeducation.ca/wp-content/uploads/2022/05/People-for-Education\\_A-Perfect-  
557 Storm-of-Stress\\_May-2022.pdf](https://peopleforeducation.ca/wp-content/uploads/2022/05/People-for-Education_A-Perfect-Storm-of-Stress_May-2022.pdf)
- 558 23. Global News K. A timeline of COVID-19 in Ontario | [Globalnews.ca](https://globalnews.ca). Global News  
559 [Internet]. 2021 May 10 [cited 2021 Aug 26]; Available from:  
560 <https://globalnews.ca/news/6859636/ontario-coronavirus-timeline/>
- 561 24. Ministry of Health. [news.ontario.ca](https://news.ontario.ca). 2021 [cited 2023 Sep 25]. COVID-19 Vaccine Booking  
562 Expanding to Youth 12+ Ahead of Schedule. Available from:  
563 [https://news.ontario.ca/en/release/1000185/covid-19-vaccine-booking-expanding-to-youth-  
564 12-ahead-of-schedule](https://news.ontario.ca/en/release/1000185/covid-19-vaccine-booking-expanding-to-youth-12-ahead-of-schedule)
- 565 25. Office of the Premier. [news.ontario.ca](https://news.ontario.ca). 2020 [cited 2023 Oct 5]. Ontario Taking Further  
566 Action to Stop the Spread of COVID-19. Available from:  
567 [https://news.ontario.ca/en/release/59305/ontario-taking-further-action-to-stop-the-spread-of-  
568 covid-19](https://news.ontario.ca/en/release/59305/ontario-taking-further-action-to-stop-the-spread-of-covid-19)
- 569 26. Office of the Premier. [news.ontario.ca](https://news.ontario.ca). 2020 [cited 2023 Sep 25]. Ontario Begins Rollout of  
570 COVID-19 Vaccine. Available from: [https://news.ontario.ca/en/release/59607/ontario-  
571 begins-rollout-of-covid-19-vaccine](https://news.ontario.ca/en/release/59607/ontario-begins-rollout-of-covid-19-vaccine)

## Impacts of extended pandemic on youth and young adults

- 572 27. Tong A, Sainsbury P, Craig J. Consolidated criteria for reporting qualitative research  
573 (COREQ): a 32-item checklist for interviews and focus groups. *International Journal for*  
574 *Quality in Health Care*. 2007 Sep 16;19(6):349–57.
- 575 28. Head BW. Why not ask them? Mapping and promoting youth participation. *Children and*  
576 *Youth Services Review*. 2011 Apr 1;33(4):541–7.
- 577 29. Nelson Ferguson K, Coen SE, Gilliland J. “It Helped Me Feel Like a Researcher”:  
578 Reflections on a Capacity-Building Program to Support Teens as Co-Researchers on a  
579 Participatory Project. *Journal of Adolescent Research*. 2023 Jun 1;07435584231176992.
- 580 30. Braun V, Clarke V. Using thematic analysis in psychology. *Qualitative Research in*  
581 *Psychology*. 2006 Jan;3(2):77–101.
- 582 31. Braun V, Clarke V. What can “thematic analysis” offer health and wellbeing researchers?  
583 *International Journal of Qualitative Studies on Health and Well-being*. 2014 Jan;9(1):26152.
- 584 32. Braun V, Clarke V. Reflecting on reflexive thematic analysis. *Qualitative Research in Sport,*  
585 *Exercise and Health*. 2019 Aug 8;11(4):589–97.
- 586 33. Braun V, Clarke V. Can I use TA? Should I use TA? Should I not use TA? Comparing  
587 reflexive thematic analysis and other pattern-based qualitative analytic approaches.  
588 *Counselling and Psychotherapy Research*. 2021;21(1):37–47.
- 589 34. Corbin J, Strauss, A. Grounded Theory Research: Procedures, Canons, and Evaluative  
590 Criteria. *Qualitative Sociology*. 1990;13(1):3–21.
- 591 35. Strauss A, Corbin J. Grounded theory methodology. *Handbook of qualitative research*.  
592 1994;17(1):273–85.
- 593 36. Cohen AK, Hoyt LT, Dull B. A Descriptive Study of COVID-19–Related Experiences and  
594 Perspectives of a National Sample of College Students in Spring 2020. *J Adolesc Health*.  
595 2020 Sep;67(3):369–75.
- 596 37. Fredrickson BL. Extracting meaning from past affective experiences: The importance of  
597 peaks, ends, and specific emotions. *Cognition & Emotion*. 2000 Jul;14(4):577–606.
- 598 38. Kahneman D, Fredrickson BL, Schreiber CA, Redelmeier DA. When More Pain Is Preferred  
599 to Less: Adding a Better End. *Psychological Science*. 1993;4(6):401–5.
- 600 39. Alfawaz HA, Wani K, Aljumah AA, Aldisi D, Ansari MGA, Yakout SM, et al.  
601 Psychological well-being during COVID-19 lockdown: Insights from a Saudi State  
602 University’s Academic Community. *Journal of King Saud University - Science*. 2021 Jan  
603 1;33(1):101262.
- 604 40. Khan AH, Sultana MS, Link to external site this link will open in a new window, Hossain S,  
605 Link to external site this link will open in a new window, Hasan MT, et al. The impact of  
606 COVID-19 pandemic on mental health & wellbeing among home-quarantined Bangladeshi

## Impacts of extended pandemic on youth and young adults

607 students: A cross-sectional pilot study. *Journal of Affective Disorders*. 2020 Dec 1;277:121–  
608 8.

609 41. López-Castro T, Brandt L, Anthonipillai NJ, Espinosa A, Melara R. Experiences, impacts  
610 and mental health functioning during a COVID-19 outbreak and lockdown: Data from a  
611 diverse New York City sample of college students. *PLoS ONE* [Internet]. 2021 Apr 7 [cited  
612 2021 Aug 25];16(4). Available from: <http://www.proquest.com/docview/2521061735>

613 42. McCluskey G, Fry D, Hamilton S, King A, Laurie M, McAra L, et al. School closures, exam  
614 cancellations and isolation: the impact of Covid-19 on young people’s mental health.  
615 *Emotional and Behavioural Difficulties*. 2021;26(1):46–59.

616
